# Supplementary material for: Whole-genome sequencing identifies ADGRG6 enhancer mutations and FRS2 duplications as angiogenesis-related drivers in bladder cancer
Source: PubMed Central journal article supplement (PMC6372626; doi:10.1038/s41467-019-08576-5), 2019-02-12
Supplement: 41467_2019_8576_MOESM2_ESM.pdf [file 41467_2019_8576_MOESM2_ESM.pdf]

### **Description of Additional Supplementary Files**

File Name: Supplementary Data 1

Description: Summary of all kinds of somatic mutations in the 65 UBC cases

File Name: Supplementary Data 2

Description: Structural variations in the 65 UBC cases

File Name: Supplementary Data 3

Description: Fusion events in the 65 UBC cases

File Name: Supplementary Movie 1

Description: A movie displays the high level of microvessel density in bladder tumor
